# Supplementary material
Source: ML conference proceedings conference paper supplement (https://proceedings.neurips.cc/paper_files/paper/2022/hash/6ad68277e27b42c60ac228c9859fc1a2-Abstract.html)
Supplement: Supplementary file 1 [file 6ad68277e27b42c60ac228c9859fc1a2-Supplemental-Conference.zip]

Archive with 114 entries (107 files):
- Chaotic-system-appendix/
- __MACOSX/._Chaotic-system-appendix
- Chaotic-system-appendix/.DS_Store
- __MACOSX/Chaotic-system-appendix/._.DS_Store
- Chaotic-system-appendix/Chaotic-system-appendix.pdf
- __MACOSX/Chaotic-system-appendix/._Chaotic-system-appendix.pdf
- Chaotic-system-appendix/code/
- __MACOSX/Chaotic-system-appendix/._code
- Chaotic-system-appendix/readme.txt
- __MACOSX/Chaotic-system-appendix/._readme.txt
- Chaotic-system-appendix/code/.DS_Store
- __MACOSX/Chaotic-system-appendix/code/._.DS_Store
- Chaotic-system-appendix/code/utilities4.py
- __MACOSX/Chaotic-system-appendix/code/._utilities4.py
- Chaotic-system-appendix/code/utilities3.py
- __MACOSX/Chaotic-system-appendix/code/._utilities3.py
- Chaotic-system-appendix/code/KS/
- __MACOSX/Chaotic-system-appendix/code/._KS
- Chaotic-system-appendix/code/KF/
- __MACOSX/Chaotic-system-appendix/code/._KF
- Chaotic-system-appendix/code/lorenz/
- __MACOSX/Chaotic-system-appendix/code/._lorenz
- Chaotic-system-appendix/code/KS/KS_lstm_benchmark.py
- __MACOSX/Chaotic-system-appendix/code/KS/._KS_lstm_benchmark.py
- Chaotic-system-appendix/code/KS/KS_mmd.py
- __MACOSX/Chaotic-system-appendix/code/KS/._KS_mmd.py
- Chaotic-system-appendix/code/KS/KS_gru_benchmark.py
- __MACOSX/Chaotic-system-appendix/code/KS/._KS_gru_benchmark.py
- Chaotic-system-appendix/code/KS/KS_fourier_eval.py
- __MACOSX/Chaotic-system-appendix/code/KS/._KS_fourier_eval.py
- Chaotic-system-appendix/code/KF/NS_eval.py
- __MACOSX/Chaotic-system-appendix/code/KF/._NS_eval.py
- Chaotic-system-appendix/code/KF/.DS_Store
- __MACOSX/Chaotic-system-appendix/code/KF/._.DS_Store
- Chaotic-system-appendix/code/KF/baseline/
- __MACOSX/Chaotic-system-appendix/code/KF/._baseline
- Chaotic-system-appendix/code/KF/MNO/
- __MACOSX/Chaotic-system-appendix/code/KF/._MNO
- Chaotic-system-appendix/code/lorenz/lorenz_utils.py
- __MACOSX/Chaotic-system-appendix/code/lorenz/._lorenz_utils.py
- Chaotic-system-appendix/code/lorenz/vector_field.py
- __MACOSX/Chaotic-system-appendix/code/lorenz/._vector_field.py
- Chaotic-system-appendix/code/lorenz/lorenz_dissipative_densenet.py
- __MACOSX/Chaotic-system-appendix/code/lorenz/._lorenz_dissipative_densenet.py
- Chaotic-system-appendix/code/KF/baseline/KF_convlstm3_500.py
- __MACOSX/Chaotic-system-appendix/code/KF/baseline/._KF_convlstm3_500.py
- Chaotic-system-appendix/code/KF/baseline/KF_convlstm1_500.py
- __MACOSX/Chaotic-system-appendix/code/KF/baseline/._KF_convlstm1_500.py
- Chaotic-system-appendix/code/KF/baseline/KF_convlstm1.py
- __MACOSX/Chaotic-system-appendix/code/KF/baseline/._KF_convlstm1.py
- Chaotic-system-appendix/code/KF/baseline/KF_UNet3_500.py
- __MACOSX/Chaotic-system-appendix/code/KF/baseline/._KF_UNet3_500.py
- Chaotic-system-appendix/code/KF/baseline/KF_UNet.py
- __MACOSX/Chaotic-system-appendix/code/KF/baseline/._KF_UNet.py
- Chaotic-system-appendix/code/KF/baseline/KF_UNet3.py
- __MACOSX/Chaotic-system-appendix/code/KF/baseline/._KF_UNet3.py
- Chaotic-system-appendix/code/KF/baseline/KF_UNet2.py
- __MACOSX/Chaotic-system-appendix/code/KF/baseline/._KF_UNet2.py
- Chaotic-system-appendix/code/KF/baseline/KF_UNet1_500.py
- __MACOSX/Chaotic-system-appendix/code/KF/baseline/._KF_UNet1_500.py
- Chaotic-system-appendix/code/KF/baseline/KF_convlstm2_500.py
- __MACOSX/Chaotic-system-appendix/code/KF/baseline/._KF_convlstm2_500.py
- Chaotic-system-appendix/code/KF/baseline/KF_convlstm_500.py
- __MACOSX/Chaotic-system-appendix/code/KF/baseline/._KF_convlstm_500.py
- Chaotic-system-appendix/code/KF/baseline/KF_UNet1.py
- __MACOSX/Chaotic-system-appendix/code/KF/baseline/._KF_UNet1.py
- Chaotic-system-appendix/code/KF/baseline/KF_convlstm.py
- __MACOSX/Chaotic-system-appendix/code/KF/baseline/._KF_convlstm.py
- Chaotic-system-appendix/code/KF/baseline/KF_UNet2_500.py
- __MACOSX/Chaotic-system-appendix/code/KF/baseline/._KF_UNet2_500.py
- Chaotic-system-appendix/code/KF/baseline/KF_convlstm2.py
- __MACOSX/Chaotic-system-appendix/code/KF/baseline/._KF_convlstm2.py
- Chaotic-system-appendix/code/KF/baseline/KF_convlstm3.py
- __MACOSX/Chaotic-system-appendix/code/KF/baseline/._KF_convlstm3.py
- Chaotic-system-appendix/code/KF/MNO/KF_fourier_big.py
- __MACOSX/Chaotic-system-appendix/code/KF/MNO/._KF_fourier_big.py
- Chaotic-system-appendix/code/KF/MNO/KF_fourier1.py
- __MACOSX/Chaotic-system-appendix/code/KF/MNO/._KF_fourier1.py
- Chaotic-system-appendix/code/KF/MNO/KF_fourier2f500.py
- __MACOSX/Chaotic-system-appendix/code/KF/MNO/._KF_fourier2f500.py
- Chaotic-system-appendix/code/KF/MNO/KF_fourier2_500.py
- __MACOSX/Chaotic-system-appendix/code/KF/MNO/._KF_fourier2_500.py
- Chaotic-system-appendix/code/KF/MNO/KF_fourier1u500.py
- __MACOSX/Chaotic-system-appendix/code/KF/MNO/._KF_fourier1u500.py
- Chaotic-system-appendix/code/KF/MNO/KF_fourier_dt.py
- __MACOSX/Chaotic-system-appendix/code/KF/MNO/._KF_fourier_dt.py
- Chaotic-system-appendix/code/KF/MNO/KF_fourier500.py
- __MACOSX/Chaotic-system-appendix/code/KF/MNO/._KF_fourier500.py
- Chaotic-system-appendix/code/KF/MNO/KF_fourier1w500.py
- __MACOSX/Chaotic-system-appendix/code/KF/MNO/._KF_fourier1w500.py
- Chaotic-system-appendix/code/KF/MNO/KF_fourier3w500.py
- __MACOSX/Chaotic-system-appendix/code/KF/MNO/._KF_fourier3w500.py
- Chaotic-system-appendix/code/KF/MNO/KF_fourier3u500.py
- __MACOSX/Chaotic-system-appendix/code/KF/MNO/._KF_fourier3u500.py
- Chaotic-system-appendix/code/KF/MNO/KF_fourier1_500.py
- __MACOSX/Chaotic-system-appendix/code/KF/MNO/._KF_fourier1_500.py
- Chaotic-system-appendix/code/KF/MNO/KF_fourier1f500.py
- __MACOSX/Chaotic-system-appendix/code/KF/MNO/._KF_fourier1f500.py
- Chaotic-system-appendix/code/KF/MNO/KF_fourier3_500.py
- __MACOSX/Chaotic-system-appendix/code/KF/MNO/._KF_fourier3_500.py
- Chaotic-system-appendix/code/KF/MNO/KF_fourier3f500.py
- __MACOSX/Chaotic-system-appendix/code/KF/MNO/._KF_fourier3f500.py
- Chaotic-system-appendix/code/KF/MNO/KF_fourier3.py
- __MACOSX/Chaotic-system-appendix/code/KF/MNO/._KF_fourier3.py
- Chaotic-system-appendix/code/KF/MNO/KF_fourier.py
- __MACOSX/Chaotic-system-appendix/code/KF/MNO/._KF_fourier.py
- Chaotic-system-appendix/code/KF/MNO/KF_fourier2u500.py
- __MACOSX/Chaotic-system-appendix/code/KF/MNO/._KF_fourier2u500.py
- Chaotic-system-appendix/code/KF/MNO/KF_fourier2w500.py
- __MACOSX/Chaotic-system-appendix/code/KF/MNO/._KF_fourier2w500.py
- Chaotic-system-appendix/code/KF/MNO/KF_fourier_fine.py
- __MACOSX/Chaotic-system-appendix/code/KF/MNO/._KF_fourier_fine.py
- Chaotic-system-appendix/code/KF/MNO/KF_fourier2.py
- __MACOSX/Chaotic-system-appendix/code/KF/MNO/._KF_fourier2.py
