# Supplementary material
Source: ML conference proceedings conference paper supplement (https://proceedings.neurips.cc/paper_files/paper/2022/hash/6ad68277e27b42c60ac228c9859fc1a2-Abstract.html)
Supplement: Supplementary file 1 [file 6ad68277e27b42c60ac228c9859fc1a2-Supplemental-Conference.zip › Chaotic-system-appendix/code/KS/KS_gru_benchmark.py]

import numpy as np
import torch
import torch.nn as nn
import torch.nn.functional as F
from torch.nn.parameter import Parameter

import matplotlib.pyplot as plt

import operator
from functools import reduce
from functools import partial

from timeit import default_timer
from utilities3 import *

torch.manual_seed(0)
np.random.seed(0)


class GRU(nn.Module):
    def __init__(self, layer, width, x_size=512):
        super(GRU, self).__init__()

        self.num_layers = layer
        self.hidden_size = width
        self.x_size = x_size

        self.gru = nn.GRU(input_size=x_size, hidden_size=width, num_layers=layer)

        self.fc = nn.Linear(width, x_size)

    def forward(self, x, h=None):

        T_size = x.shape[0]
        batch_size = x.shape[1]

        # h, c (num_layers * num_directions, batch, hidden_size)
        if h ==None:
            h = self.init_hidden(shape=(self.num_layers, batch_size, self.hidden_size), device=x.device)

        #input (seq_len, batch, input_size)
        out, h = self.gru(x.view(T_size, batch_size, self.x_size), h)

        out = self.fc(out)

        return out, h

    def init_hidden(self, shape, device):
        return torch.zeros(shape, device=device)

    def count_params(self):
        c = 0
        for p in self.parameters():
            c += reduce(operator.mul, list(p.size()))
        return c

PATH_DATA = 'data/KS_L64pi_N1200_s512_T500_t2000.mat'


Ntrain = 1000 # training instances
Ntest = 200 # testing instances
T_in = 1000
T_out = 2000
t_sub = 1
T = 100
T_iter = ((T_out - T_in)//T//t_sub)
t = T # timesteps


ntrain = Ntrain * T_iter * T
ntest = Ntest * T_iter * T

sub = 1 #subsampling rate
s = 512 // sub

print(Ntrain, Ntest, ntrain, ntest)
print(T_in, T_out, T, T_iter, s)

batch_size = 50
learning_rate = 0.001

epochs = 50
step_size = 5
gamma = 0.5
ep_print = 1

layer = 1
width = 1000

print(layer, width, batch_size, learning_rate, epochs)


path = 'KS_gru_N'+str(ntrain)+ '_s' + str(s) +'_ep' + str(epochs) + '_l' + str(layer) + '_w' + str(width)
path_model = 'model/'+path
path_pred = 'pred/'+path+'.mat'
path_error = 'results/'+path+'train.txt'


dataloader = MatReader(PATH_DATA)
x_train = dataloader.read_field('u')[:Ntrain, T_in-t_sub:T_out-t_sub:t_sub, ::sub].reshape(Ntrain,T_iter,t,s)
y_train = dataloader.read_field('u')[:Ntrain, T_in:T_out:t_sub, ::sub].reshape(Ntrain,T_iter,t,s)
print(x_train.shape)
print(y_train.shape)
x_test = dataloader.read_field('u')[-Ntest:, T_in-t_sub:T_out-t_sub:t_sub, ::sub].reshape(Ntest,T_iter,t,s)
y_test = dataloader.read_field('u')[-Ntest:, T_in:T_out:t_sub, ::sub].reshape(Ntest,T_iter,t,s)


train_loader = torch.utils.data.DataLoader(torch.utils.data.TensorDataset(x_train, y_train), batch_size=batch_size, shuffle=False)
test_loader = torch.utils.data.DataLoader(torch.utils.data.TensorDataset(x_test, y_test), batch_size=batch_size, shuffle=False)

model = GRU(layer=layer, width=width, x_size=s).cuda()
# model = torch.load('model/KS_gru_N250000_s512_ep50_l1_w1000')

print(model.count_params())

myloss = LpLoss(size_average=False)

optimizer = torch.optim.Adam(model.parameters(), lr=learning_rate, weight_decay=1e-4)
scheduler = torch.optim.lr_scheduler.StepLR(optimizer, step_size=step_size, gamma=gamma)

error = np.zeros((epochs+1, 2))
for ep in range(epochs):
    model.train()
    t1 = default_timer()
    train_l2 = 0
    train_traj = np.zeros(T_iter, )

    for xx, yy in train_loader:
        xx = xx.to(device)
        yy = yy.to(device)

        for i in range(0, T_iter):
            h = None

            # xx,yy: (batch, T_iter, t, s)
            x = xx[:, i, :, :].permute(1,0,2) # (t, batch, s)
            y = yy[:, i, :, :].permute(1,0,2) # (t, batch, s)

            im, h = model(x, h)

            h = h.detach()

            optimizer.zero_grad()
            loss = myloss(im.reshape(-1, s), y.reshape(-1, s))
            loss.backward()
            optimizer.step()

            train_traj[i] += loss.item()
            train_l2 += loss.item()

    if ep % ep_print == ep_print-1:
        test_l2 = 0
        test_traj = np.zeros(T_iter, )

        model.eval()
        with torch.no_grad():
            for xx, yy in test_loader:
                xx = xx.to(device)
                yy = yy.to(device)
                h = None
                for i in range(0, T_iter):
                    # xx,yy: (batch, T_iter, t, s)
                    x = xx[:, i, :, :].permute(1, 0, 2)  # (t, batch, s)
                    y = yy[:, i, :, :].permute(1, 0, 2)  # (t, batch, s)

                    im, h = model(x, h)

                    loss = myloss(im.reshape(-1, s), y.reshape(-1, s))
                    test_traj[i] += loss.item()
                    test_l2 += loss.item()

        t2 = default_timer()

        train_l2 = train_l2 / (T_iter*Ntrain*T)
        train_traj = train_traj / (Ntrain*T)
        test_l2 = test_l2 / (T_iter*Ntest*T)
        test_traj = test_traj / (Ntest*T)

        print(ep, t2 - t1, train_l2, test_l2)
        # print(ep, t2 - t1, train_l2, train_traj, test_l2, test_traj)
        error[ep] = [train_l2, test_l2]

    scheduler.step()
torch.save(model, path_model )


# test
T_in = 1000
T_out = 2000
T_warmup = 1500
T_iter = (T_out-T_in)//t_sub
print(T_out, T_warmup)

dataloader = MatReader(PATH_DATA)
x_test = dataloader.read_field('u')[-1, T_in-t_sub, ::sub].reshape(1, s)
y_test = dataloader.read_field('u')[-1, T_in:T_out:t_sub, ::sub].reshape(T_iter, s)

print(x_test.shape)

test_loader = torch.utils.data.DataLoader(torch.utils.data.TensorDataset(y_test), batch_size=1, shuffle=False)
myloss = LpLoss(size_average=False)

model.eval()
with torch.no_grad():
    pred = torch.zeros(T_iter, s)
    errors = torch.zeros(T_iter, )
    index = 0
    out = x_test.cuda()
    h = None
    c = None
    #no warm up
    for y, in test_loader:
        x_in = out.view(1, 1, s)
        y = y.cuda()

        out, h = model(x_in, h)
        pred[index] = out.reshape(1,s)

        l2 = myloss(out.view(1, -1), y.view(1, -1)).item()
        errors[index] = l2
        # if index % ep_print == ep_print-1:
        #     print(index, l2)
        index = index + 1

    #warm up
    pred2 = torch.zeros(T_iter, s)
    errors2 = torch.zeros(T_iter, )
    index = 0
    out = x_test.cuda()
    h = None
    for y, in test_loader:
        x_in = out.view(1, 1, s)
        y = y.cuda()

        out, h = model(x_in, h)
        pred2[index] = out.reshape(1,s)

        l2 = myloss(out.view(1, -1), y.view(1, -1)).item()
        errors2[index] = l2
        # if index % ep_print == ep_print-1:
        #     print(index, l2)
        index = index + 1

        if index*t_sub+T_in < T_warmup:
            out = y

scipy.io.savemat(path_pred, mdict={'pred': pred.cpu().numpy(), 'pred2': pred2.cpu().numpy(), 'y': y_test.cpu().numpy(),})
