# Supplementary material
Source: ML conference proceedings conference paper supplement (https://proceedings.neurips.cc/paper_files/paper/2022/hash/6ad68277e27b42c60ac228c9859fc1a2-Abstract.html)
Supplement: Supplementary file 1 [file 6ad68277e27b42c60ac228c9859fc1a2-Supplemental-Conference.zip › Chaotic-system-appendix/code/KS/KS_lstm_benchmark.py]

import numpy as np
import torch
import torch.nn as nn
import torch.nn.functional as F
from torch.nn.parameter import Parameter

import matplotlib.pyplot as plt

import operator
from functools import reduce
from functools import partial

from timeit import default_timer
from utilities3 import *

torch.manual_seed(0)
np.random.seed(0)


class LSTM(nn.Module):
    def __init__(self, layer, width, x_size=512):
        super(LSTM, self).__init__()

        self.num_layers = layer
        self.hidden_size = width
        self.x_size = x_size

        self.lstm = nn.LSTM(input_size=x_size, hidden_size=width, num_layers=layer)

        self.fc = nn.Linear(width, x_size)

    def forward(self, x, h=None, c=None):

        T_size = x.shape[0]
        batch_size = x.shape[1]

        # h, c (num_layers * num_directions, batch, hidden_size)
        if h ==None:
            h, c = self.init_hidden(shape=(self.num_layers, batch_size, self.hidden_size), device=x.device)

        #input (seq_len, batch, input_size)
        out, (h, c) = self.lstm(x.view(T_size, batch_size, self.x_size), (h, c))

        out = self.fc(out)

        return out, h, c

    def init_hidden(self, shape, device):
        return (torch.zeros(shape, device=device),
                torch.zeros(shape, device=device))

    def count_params(self):
        c = 0
        for p in self.parameters():
            c += reduce(operator.mul, list(p.size()))

        return c

PATH_DATA = 'data/KS_L64pi_N1200_s512_T500_t2000.mat'


Ntrain = 1000 # training instances
Ntest = 200 # testing instances
T_in = 1000
T_out = 2000
T = 20
T_iter = ((T_out - T_in)//T)
t = T # timesteps

ntrain = Ntrain * T_iter * T
ntest = Ntest * T_iter * T

sub = 2 #subsampling rate
s = 512 // sub

print(Ntrain, Ntest, ntrain, ntest)
print(T_in, T_out, T, T_iter, s)

batch_size = 50
learning_rate = 0.001

epochs = 100
step_size = 10
gamma = 0.5
ep_print = 1

layer = 1
width = 1000

print(layer, width, batch_size, learning_rate, epochs)


path = 'KS_lstm_N'+str(ntrain)+ '_s' + str(s) +'_ep' + str(epochs) + '_l' + str(layer) + '_w' + str(width)
path_model = 'model/'+path
path_pred = 'pred/'+path+'.mat'
path_error = 'results/'+path+'train.txt'


dataloader = MatReader(PATH_DATA)
x_train = dataloader.read_field('u')[:Ntrain, T_in-1:T_out-1, ::sub].reshape(Ntrain,T_iter,t,s)
y_train = dataloader.read_field('u')[:Ntrain, T_in:T_out, ::sub].reshape(Ntrain,T_iter,t,s)
print(x_train.shape)
print(y_train.shape)
x_test = dataloader.read_field('u')[-Ntest:, T_in-1:T_out-1, ::sub].reshape(Ntest,T_iter,t,s)
y_test = dataloader.read_field('u')[-Ntest:, T_in:T_out, ::sub].reshape(Ntest,T_iter,t,s)


train_loader = torch.utils.data.DataLoader(torch.utils.data.TensorDataset(x_train, y_train), batch_size=batch_size, shuffle=False)
test_loader = torch.utils.data.DataLoader(torch.utils.data.TensorDataset(x_test, y_test), batch_size=batch_size, shuffle=False)

# model = LSTM(layer=layer, width=width, x_size=s).cuda()
model = torch.load('model/KS_lstm_N1000000_s512_ep50_l1_w1000')

print(model.count_params())

myloss = LpLoss(size_average=False)

# optimizer = torch.optim.Adam(model.parameters(), lr=learning_rate, weight_decay=1e-4)
# scheduler = torch.optim.lr_scheduler.StepLR(optimizer, step_size=step_size, gamma=gamma)
#
# error = np.zeros((epochs+1, 2))
# for ep in range(epochs):
#     model.train()
#     t1 = default_timer()
#     train_l2 = 0
#     train_traj = np.zeros(T_iter, )
#
#     for xx, yy in train_loader:
#         xx = xx.to(device)
#         yy = yy.to(device)
#         h = None
#         c = None
#
#         for i in range(0, T_iter):
#
#             # xx,yy: (batch, T_iter, t, s)
#             x = xx[:, i, :, :].permute(1,0,2) # (t, batch, s)
#             y = yy[:, i, :, :].permute(1,0,2) # (t, batch, s)
#
#             im, h, c = model(x, h, c)
#
#             h = h.detach()
#             c = c.detach()
#
#             optimizer.zero_grad()
#             loss = myloss(im.reshape(-1, s), y.reshape(-1, s))
#             loss.backward()
#             optimizer.step()
#
#             train_traj[i] += loss.item()
#             train_l2 += loss.item()
#
#     if ep % ep_print == ep_print-1:
#         test_l2 = 0
#         test_traj = np.zeros(T_iter, )
#
#         model.eval()
#         with torch.no_grad():
#             for xx, yy in test_loader:
#                 xx = xx.to(device)
#                 yy = yy.to(device)
#                 h = None
#                 c = None
#                 for i in range(0, T_iter):
#                     # xx,yy: (batch, T_iter, t, s)
#                     x = xx[:, i, :, :].permute(1, 0, 2)  # (t, batch, s)
#                     y = yy[:, i, :, :].permute(1, 0, 2)  # (t, batch, s)
#
#                     im, h, c = model(x, h, c)
#
#                     loss = myloss(im.reshape(-1, s), y.reshape(-1, s))
#                     test_traj[i] += loss.item()
#                     test_l2 += loss.item()
#
#         t2 = default_timer()
#
#         train_l2 = train_l2 / (T_iter*Ntrain*T)
#         train_traj = train_traj / (Ntrain*T)
#         test_l2 = test_l2 / (T_iter*Ntest*T)
#         test_traj = test_traj / (Ntest*T)
#
#         print(ep, t2 - t1, train_l2, test_l2)
#         # print(ep, t2 - t1, train_l2, train_traj, test_l2, test_traj)
#         error[ep] = [train_l2, test_l2]
#
#     scheduler.step()
# torch.save(model, path_model )


# test
T_in = 1000
T_out = 2000
T_warmup = 1500
T_iter = (T_out-T_in)
print(T_out, T_warmup)

dataloader = MatReader(PATH_DATA)
x_test = dataloader.read_field('u')[-1, (T_in-1), ::sub].reshape(1, s)
y_test = dataloader.read_field('u')[-1, T_in:T_out, ::sub].reshape(T_iter, s)

print(x_test.shape)

test_loader = torch.utils.data.DataLoader(torch.utils.data.TensorDataset(y_test), batch_size=1, shuffle=False)

model.eval()
with torch.no_grad():
    pred = torch.zeros(T_iter, s)
    errors = torch.zeros(T_iter, )
    index = 0
    out = x_test.cuda()
    h = None
    c = None
    #no warm up
    for y, in test_loader:
        x_in = out.view(1, 1, s)
        y = y.cuda()

        out, h, c = model(x_in, h, c)
        pred[index] = out.reshape(1,s)

        l2 = myloss(out.view(1, -1), y.view(1, -1)).item()
        errors[index] = l2
        # if index % ep_print == ep_print-1:
        #     print(index, l2)
        index = index + 1

    #warm up
    pred2 = torch.zeros(T_iter, s)
    errors2 = torch.zeros(T_iter, )
    index = 0
    out = x_test.cuda()
    h = None
    c = None
    for y, in test_loader:
        x_in = out.view(1, 1, s)
        y = y.cuda()

        out, h, c = model(x_in, h, c)
        pred2[index] = out.reshape(1,s)

        l2 = myloss(out.view(1, -1), y.view(1, -1)).item()
        errors2[index] = l2
        # if index % ep_print == ep_print-1:
        #     print(index, l2)
        index = index + 1

        if index+T_in < T_warmup:
            out = y

scipy.io.savemat(path_pred, mdict={'pred': pred.cpu().numpy(), 'pred2': pred2.cpu().numpy(), 'y': y_test.cpu().numpy(),})
