# Supplementary material
Source: ML conference proceedings conference paper supplement (https://proceedings.neurips.cc/paper_files/paper/2022/hash/6ad68277e27b42c60ac228c9859fc1a2-Abstract.html)
Supplement: Supplementary file 1 [file 6ad68277e27b42c60ac228c9859fc1a2-Supplemental-Conference.zip › Chaotic-system-appendix/code/lorenz/lorenz_dissipative_densenet.py]

import torch
import numpy as np
import torch.nn as nn
import torch.nn.functional as F

import matplotlib.pyplot as plt
from lorenz_utils import *

from timeit import default_timer
import scipy.io

torch.manual_seed(0)
np.random.seed(0)

def sample_uniform_spherical_shell(npoints, radii, ndim=3):
    inner_radius, outer_radius = radii
    pts = []
    for i in range(npoints):
        # uniformly sample radius
        samp_radius = np.random.uniform(inner_radius, outer_radius)
        vec = np.random.randn(ndim) # ref: https://mathworld.wolfram.com/SpherePointPicking.html and StackOverflow
        vec /= np.linalg.norm(vec, axis=0)
        pts.append(samp_radius*vec)

    return np.array(pts)

def linear_scale_dissipative_target(inputs, scale):
    return scale*inputs

def scale_down_norm(inputs, scale):
    return scale * torch.norm(inputs)

if __name__ == '__main__':
    ntrain = 160000
    ntest = 38000
    scale_inputs = False

    # DISSIPATIVE REGULARIZATION PARAMETERS
    radius = 90 # radius of inner ball
    scale_down = 0.5 # rate at which to linearly scale down inputs
    loss_weight = 1
    radii = (radius, radius+40)
    sampling_fn = sample_uniform_spherical_shell #numsampled is batch size
    target_fn = linear_scale_dissipative_target

    in_dim = 3
    out_dim = 3

    batch_size = 256
    epochs = 1000
    learning_rate = 0.0005

    layers = [in_dim, in_dim*50, in_dim*50,  in_dim*50, in_dim*50, in_dim*50, in_dim*50, out_dim]
    nonlinearity = nn.ReLU
    #nonlinearity_list = [nn.Tanh, nn.ReLU, nn.ReLU, nn.ReLU, nn.ReLU, nn.ReLU, nn.ReLU]

    rel_loss = True # relative Lp loss

    scheduler_step = 100
    scheduler_gamma = 0.5

    print()
    print("Epochs:", epochs)
    print("Learning rate:", learning_rate)
    print("Scheduler step:", scheduler_step)
    print("Scheduler gamma:", scheduler_gamma)
    print()

    path = 'lorenz_dissipative_densenet_inner_rad_90_relu_0_05_time_test1'+str(ntrain)+'_ep' + str(epochs) + '_lr' + str(learning_rate).replace('.','_') + '_schedstep' + str(scheduler_step).replace('.','_') + '_relLp' + str(rel_loss) + '_layers' + str(layers)[1:-1].replace(', ', '_')
    path_model = 'model/'+path
    print(path)

    # Data
    sub = 6 #CHANGE
    steps_per_sec = 21
    t1 = default_timer()

    predloader = MatReader('L63T10000.mat')
    data = predloader.read_field('u')[::sub] #subsample
    data = torch.tensor(data, dtype=torch.float)

    train_a = data[:ntrain]
    train_u = data[1:ntrain+1]

    train_mean = torch.mean(train_a)
    train_max = torch.max(train_a)
    train_min = torch.min(train_a)

    if scale_inputs:
        train_a = (train_a - train_mean)/(train_max - train_min)
        train_u = (train_u - train_mean)/(train_max - train_min)

    test_a = data[-ntest:-1]
    test_u = data[-ntest + 1:]

    if scale_inputs:
        test_a = (test_a - train_mean)/(train_max - train_min)
        test_u = (test_u - train_mean)/(train_max - train_min)

    assert train_a.shape == train_u.shape
    assert test_a.shape == test_u.shape

    train_loader = torch.utils.data.DataLoader(torch.utils.data.TensorDataset(train_a, train_u), batch_size=batch_size, shuffle=True)
    test_loader = torch.utils.data.DataLoader(torch.utils.data.TensorDataset(test_a, test_u), batch_size=batch_size, shuffle=False)

    t2 = default_timer()

    print('preprocessing finished, time used:', t2-t1)
    print()
    device = torch.device('cuda')

    # Model
    model = DenseNet(layers, nonlinearity).cuda()
    #model = DenseNetLessBias(layers, nonlinearity).cuda() 
    #model = DenseNetManualNonlinearity(layers, nonlinearity_list).cuda()
    print("Model parameters:", model.count_params())
    print()

    # Training
    optimizer = torch.optim.Adam(model.parameters(), lr=learning_rate, weight_decay=1e-4)
    scheduler = torch.optim.lr_scheduler.StepLR(optimizer, step_size=scheduler_step, gamma=scheduler_gamma)
    
    if rel_loss:
       trainloss = LpLoss(size_average=False)
       dissloss = LpLoss(size_average=False)
       testloss = LpLoss(size_average=False)
       test_dissloss = LpLoss(size_average=False)
       testloss_1sec = LpLoss(size_average=False)
    else:
        trainloss = nn.MSELoss(reduction='sum')
        dissloss = nn.MSELoss(reduction='sum')
        testloss = nn.MSELoss(reduction='sum')
        test_dissloss = nn.MSELoss(reduction='sum')
        testloss_1sec = nn.MSELoss(reduction='sum')

    for ep in range(epochs):
        model.train()
        t1 = default_timer()
        one_sec_count = 0
        train_l2 = 0
        diss_l2 = 0
        for x, y in train_loader:
            x = x.to(device).view(-1, out_dim)
            y = y.to(device).view(-1, out_dim)

            out = model(x).reshape(-1, out_dim)
            data_loss = trainloss(out, y)
            train_l2 += data_loss.item()

            x_diss = torch.tensor(sampling_fn(x.shape[0], radii), dtype=torch.float).to(device)
            assert(x_diss.shape == x.shape)
            y_diss = torch.tensor(target_fn(x_diss, scale_down), dtype=torch.float).to(device)
            out_diss = model(x_diss).reshape(-1, out_dim)
            diss_loss = loss_weight*dissloss(out_diss, y_diss) # weighted
            diss_l2 += diss_loss.item()

            loss = data_loss + diss_loss

            optimizer.zero_grad()
            loss.backward()
            optimizer.step()

        test_l2 = 0
        test_diss_l2 = 0
        test_l2_1_sec = 0
        with torch.no_grad():
            for x, y in test_loader:
                x = x.to(device).view(-1, out_dim)
                y = y.to(device).view(-1, out_dim)

                out = model(x).reshape(-1, out_dim)
                test_l2 += testloss(out, y).item()

                x_diss = torch.tensor(sampling_fn(x.shape[0], radii), dtype=torch.float).to(device)
                assert(x_diss.shape == x.shape)
                y_diss = torch.tensor(target_fn(x_diss, scale_down), dtype=torch.float).to(device)
                out_diss = model(x_diss).reshape(-1, out_dim)
                test_diss_loss = loss_weight*test_dissloss(out_diss, y_diss) # weighted
                test_diss_l2 += test_diss_loss.item()

                x_subsample = x[::steps_per_sec]
                x_1sec = x_subsample[:-2] # inputs
                y_1sec = x_subsample[1:-1] # ground truth
                out = x_1sec
                for i in range(steps_per_sec):
                    out = model(out).reshape(-1, out_dim)
                test_1_sec_loss = testloss_1sec(out, y_1sec)
                test_l2_1_sec += test_1_sec_loss.item()
                one_sec_count += (int)(y_1sec.shape[0])

        t2 = default_timer()
        scheduler.step()
        print(ep, t2 - t1, train_l2/(ntrain), test_l2/(ntest), diss_l2/(ntrain), test_diss_l2/(ntest), test_l2_1_sec/(one_sec_count))

    torch.save(model, path_model)
    print("Weights saved to", path_model)

    model.eval()
    test_a = test_a[0]

    T = 200000
    pred = torch.zeros(T, out_dim)
    out = test_a.reshape(1,in_dim).cuda()
    with torch.no_grad():
        for i in range(T):
            out = model(out.reshape(1,in_dim))
            pred[i] = out.view(out_dim,)

    scipy.io.savemat('pred/'+path+'.mat', mdict={'pred': pred.cpu().numpy()})
    print("Predictions saved to", 'pred/'+path+'.mat')
