# Supplementary material
Source: ML conference proceedings conference paper supplement (https://proceedings.neurips.cc/paper_files/paper/2022/hash/6ad68277e27b42c60ac228c9859fc1a2-Abstract.html)
Supplement: Supplementary file 1 [file 6ad68277e27b42c60ac228c9859fc1a2-Supplemental-Conference.zip › Chaotic-system-appendix/code/lorenz/lorenz_utils.py]

import torch
import numpy as np
import scipy.io
import h5py
import torch.nn as nn

device = torch.device('cuda' if torch.cuda.is_available() else 'cpu')

# reading data
class MatReader(object):
    def __init__(self, file_path, to_torch=True, to_cuda=False, to_float=True):
        super(MatReader, self).__init__()

        self.to_torch = to_torch
        self.to_cuda = to_cuda
        self.to_float = to_float

        self.file_path = file_path

        self.data = None
        self.old_mat = True
        self.h5 = False
        self._load_file()

    def _load_file(self):

        if self.file_path[-3:] == '.h5':
            self.data = h5py.File(self.file_path, 'r')
            self.h5 = True

        else:
            try:
                self.data = scipy.io.loadmat(self.file_path)
            except:
                self.data = h5py.File(self.file_path, 'r')
                self.old_mat = False

    def load_file(self, file_path):
        self.file_path = file_path
        self._load_file()

    def read_field(self, field):
        x = self.data[field]

        if self.h5:
            x = x[()]

        if not self.old_mat:
            x = x[()]
            x = np.transpose(x, axes=range(len(x.shape) - 1, -1, -1))

        if self.to_float:
            x = x.astype(np.float32)

        if self.to_torch:
            x = torch.from_numpy(x)

            if self.to_cuda:
                x = x.cuda()

        return x

    def set_cuda(self, to_cuda):
        self.to_cuda = to_cuda

    def set_torch(self, to_torch):
        self.to_torch = to_torch

    def set_float(self, to_float):
        self.to_float = to_float

# A simple feedforward neural network
class DenseNet(torch.nn.Module):
    def __init__(self, layers, nonlinearity, out_nonlinearity=None, normalize=False):
        super(DenseNet, self).__init__()

        self.n_layers = len(layers) - 1

        assert self.n_layers >= 1

        self.layers = nn.ModuleList()

        for j in range(self.n_layers):
            self.layers.append(nn.Linear(layers[j], layers[j+1]))

            if j != self.n_layers - 1:
                if normalize:
                    self.layers.append(nn.BatchNorm1d(layers[j+1]))

                self.layers.append(nonlinearity())

        if out_nonlinearity is not None:
            self.layers.append(out_nonlinearity())

    def forward(self, x):
        for _, l in enumerate(self.layers):
            x = l(x)

        return x

    def count_params(self):
        return sum(p.numel() for p in self.parameters() if p.requires_grad)

# Adds no bias if the layer dim decreases
class DenseNetLessBias(torch.nn.Module):
    def __init__(self, layers, nonlinearity, out_nonlinearity=None, normalize=False):
        super(DenseNetLessBias, self).__init__()

        self.n_layers = len(layers) - 1

        assert self.n_layers >= 1

        self.layers = nn.ModuleList()

        for j in range(self.n_layers):
            self.layers.append(nn.Linear(layers[j], layers[j+1], bias=(layers[j] <= layers[j+1])))

            if j != self.n_layers - 1:
                if normalize:
                    self.layers.append(nn.BatchNorm1d(layers[j+1]))

                self.layers.append(nonlinearity())

        if out_nonlinearity is not None:
            self.layers.append(out_nonlinearity())

    def forward(self, x):
        for _, l in enumerate(self.layers):
            x = l(x)

        return x

    def count_params(self):
        return sum(p.numel() for p in self.parameters() if p.requires_grad)

# Add layer nonlinearity for each layer as a list
class DenseNetManualNonlinearity(torch.nn.Module):
    def __init__(self, layers, nonlinearity_list, out_nonlinearity=None, normalize=False):
        super(DenseNetManualNonlinearity, self).__init__()

        self.n_layers = len(layers) - 1
        assert len(nonlinearity_list) == len(layers) - 1

        assert self.n_layers >= 1

        self.layers = nn.ModuleList()

        for j in range(self.n_layers):
            self.layers.append(nn.Linear(layers[j], layers[j+1], bias=(layers[j] <= layers[j+1])))

            if j != self.n_layers - 1:
                if normalize:
                    self.layers.append(nn.BatchNorm1d(layers[j+1]))

                self.layers.append(nonlinearity_list[j]())

        if out_nonlinearity is not None:
            self.layers.append(out_nonlinearity())

    def forward(self, x):
        for _, l in enumerate(self.layers):
            x = l(x)

        return x

    def count_params(self):
        return sum(p.numel() for p in self.parameters() if p.requires_grad)


#loss function with rel Lp loss
class LpLoss(object):
    def __init__(self, p=2, size_average=True, reduction=True):
        super(LpLoss, self).__init__()

        #Lp-norm type are postive
        assert p > 0

        self.p = p
        self.reduction = reduction
        self.size_average = size_average

    def rel(self, x, y, std):
        num_examples = x.size()[0]

        diff_norms = torch.norm(x.reshape(num_examples,-1) - y.reshape(num_examples,-1), self.p, 1)
        y_norms = torch.norm(y.reshape(num_examples,-1), self.p, 1)

        if std == True:
            return torch.std(diff_norms / y_norms)

        if self.reduction:
            if self.size_average:
                return torch.mean(diff_norms / y_norms)
            else:
                return torch.sum(diff_norms / y_norms)
        return diff_norms / y_norms


    def __call__(self, x, y, std=False):
        return self.rel(x, y, std)
