# Supplementary material
Source: ML conference proceedings conference paper supplement (https://proceedings.neurips.cc/paper_files/paper/2022/hash/6ad68277e27b42c60ac228c9859fc1a2-Abstract.html)
Supplement: Supplementary file 1 [file 6ad68277e27b42c60ac228c9859fc1a2-Supplemental-Conference.zip › Chaotic-system-appendix/readme.txt]

This is the supplementary material for the submission "Learning Dissipative Dynamics in Chaotic Systems." at Neurips 2022.

The datasets are available at https://drive.google.com/drive/folders/1j4yg6LscmupvyLSdXF9-zk-PU_1pG2TY?usp=sharing

The code consists of stand-along scripts corresponding to each experiment. It requires Pytorch 1.8+
